# Supplementary material for: Shotgun proteomics aids discovery of novel protein-coding genes, alternative splicing, and “resurrected” pseudogenes in the mouse genome
Source: HighWire-hosted journal article supplement (doi:10.1101/gr.114272.110), 2011-04-01
Supplement: Brosch_114272_Supp_Table1.docx [file Brosch_114272_Supp_Table1.docx]

| **Mass Spec tag sequence** | **# PSM's** | **PEP score** | **Overlapping Ensmbl transcript** | **Mapping (+/- 5 bp)** | **Peptide Tissue Expression** | **Description** | **Instruments** |
| --- | --- | --- | --- | --- | --- | --- | --- |
| QTIIDTVDPYPVGKPPLPR* | 2 | 75 | ENSMUST00000099032 | 3:78976842-78976898;-1 | Brain | Novel 5’ exon | LTQ-FT |
| PAGGAGDMWR | 13 | 36 | ENSMUST00000094404 | 7:54004297-54008807;1 | Brain, Kidney, Liver, Placenta, Heart | Novel 5’ exon | LCQ DECA XP |
| VNNSSLIGVGYTQTLRPGQR | 6 | 53 | ENSMUST00000022293 | 14:22663110-22663840;1 | Brain, Heart | Novel 3’ exon | LCQ DECA XP |
| VGLLLVFPLIQSQSR* | 2 | 41 | ENSMUST00000065641 | 5:121704125-121704169;1 | Brain | upATG | LTQ-FT |
| GPSPETGAAAMAESIIIR* | 3 | 36 | ENSMUST00000044271 | 11:120294434-120298857;-1 | Brain, Testes | upATG | LTQ-FT |
| FCLDRPLTTAMSR* | 2 | 32 | ENSMUST00000030623 | 4:126698631-126698669;1 | Brain | upATG | LTQ-FT |
| YSLQVAAMSTLLDIK* | 19 | 31 | ENSMUST00000049911 | 17:25389057-25389101;-1 | Brain, Kidney, Liver | upATG | LCQ DECA XP, LTQ-FT |
| GSPAPSSASSSASDLSR* | 5 | 53 | ENSMUST00000106143 | 11:120645896-120645946;1 | Brain, Testes | upATG | LTQ-FT,LCQ DECA |
| PGAAAAAAAMLPAQEAAK* | 5 | 82 | ENSMUST00000073678 | 5:22252014-22252067;1 | Brain, Liver | upATG | LTQ-FT |
| LAAAAAGADASGAAR* | 3 | 62 | ENSMUST00000022496 | 14:62058633-62058677;-1 | Brain | upORF | LTQ-FT |
| NQGPCYDSSAVSSGIQGATQGGR | 3 | 46 | ENSMUST00000112411 | 1:133545990-133546058;1 | Red Blood Cell Membrane | upORF | LTQ |
| AAGKDPFAELSLEDFL* | 2 | 88 | ENSMUST00000049537 | 7:97354712-97354759;1 | Brain | Splice variant | LTQ-FT |
| ACATMPDKKADCTITMADSDLLALMTGK* | 14 | 84 | ENSMUST00000106700 | 4:107720210-107722383;-1 | Liver | Splice variant | LTQ-FT, LTQ, LCQ DECA XP |
| GELTPQRPSPFASQEEGLR* | 2 | 69 | ENSMUST00000120005 | 7:53059009-53059065;1 | Brain | Splice variant | LTQ-FT |
| VGPLLVEYEVLEALTDEK | 2 | 55 | ENSMUST00000112678 | 17:69632255-69632308;1 | Brain | Splice variant | LTQ |
| QLDEIPALSVSRPQTGLSFLGPEPEDLEDLYSR* | 6 | 54 | ENSMUST00000032824 | 7:28834129-28843062;-1 | Brain, Liver, Placenta | Splice variant | LTQ-FT |
| DATNVGDEGGFAPNILENSEAPWVSR | 18 | 53 | ENSMUST00000072856 | 6:124715752-124716183;-1 | Heart | Splice variant | LCQ DECA |
| AVLSILAVR* | 4 | 52 | ENSMUST00000026504 | 10:126324706-126324732;-1 | Brain, Kidney | Splice variant | LTQ-FT |
| MRAEADVASLNR* | 18 | 50 | ENSMUST00000113696 | 9:66883906-66887906;-1 | Brain, Kidney, Liver, Lung, Heart | Splice variant | LTQ-FT, LTQ |
| ARGTKAGLGCSTVPLQMTSAYAATK* | 12 | 49 | ENSMUST00000034304 | 8:120266498-120277129;1 | Liver | Splice variant | LTQ-FT, LCQ DECA XP |
| ADDVDQAYDQHLNMILGDVEETVTTIEIDEETYEEIYK | 21 | 48 | ENSMUST00000040607 | 6:91466055-91469638;1 | Kidney, Lung, Placenta | Splice variant | LCQ DECA XP |
| YSPHCKLLIVSNPVPVWSGVNVAGVSLK | 70 | 48 | ENSMUST00000048209 | 7:54105682-54107290;1 | Brain, Kidney, Liver, Lung, Placenta, Heart | Splice variant | LCQ DECA XP, LTQ |
| GCPVELFWKGWSPEDAVSLERLLPGACSHLQSQMR* | 2 | 44 | ENSMUST00000022596 | 14:87817206-87824978;1 | Liver | Splice variant | LTQ-FT |
| MAPSAGRIADNLSYIEHIFEISR | 4 | 39 | ENSMUST00000111247 | 1:174129357-174130263;-1 | Brain, Placenta | Splice variant | LCQ Classic, LTQ |
| CDHMQGGSGGVQIRSWWTHVEMGPPDPILGVTEAFK | 3 | 33 | ENSMUST00000040481 | 8:98401703-98411579;-1 | Brain | Splice variant | LCQ Classic |
| PSKAQNDVMVPDREIIQSLIALVNDPQPEHPLR | 13 | 32 | ENSMUST00000115700 | 16:17154320-17159859;-1 | Brain, Liver, Placenta, Heart | Splice variant | LCQ DECA XP |
| AARFGANLRVISTLSVGVDHLALDEIK* | 4 | 32 | ENSMUST00000107819 | 4:44996366-44996813;1 | Liver, Testes | Splice variant | LTQ-FT, LCQ DECA XP |
| MTDASQKAPLPESKGETSGQEK* | 3 | 32 | ENSMUST00000082107 | 11:119270421-119270486;1 | Brain | Splice variant | LTQ-FT |
| KATSAQLWDTAGQER* | 3 | 31 | ENSMUST00000109602 | 11:20118832-20123110;1 | Liver | Splice variant | LTQ-FT, LTQ |
| SLVGKLISDTISDDSK | 3 | 31 | ENSMUST00000020568 | 11:21589646-21596519;1 | Heart | Splice variant | LCQ DECA XP |
| KQAEILELAGNAAR | 14 | 30 | ENSMUST00000045788 | 13:56206322-56210707;-1 | Kidney, Liver, Lung, Placenta | Splice variant | LCQ DECA XP |
