# Supplementary material for: Shotgun proteomics aids discovery of novel protein-coding genes, alternative splicing, and “resurrected” pseudogenes in the mouse genome
Source: HighWire-hosted journal article supplement (doi:10.1101/gr.114272.110), 2011-04-01
Supplement: Brosch_114272_Supp_Table2.docx [file Brosch_114272_Supp_Table2.docx]

| **Sample Accession** | **Name** | **Organism** | **Description** | **Instrument** |
| --- | --- | --- | --- | --- |
| 15297(PRIDE) | Mouse Brain Membrane | Mouse | Brain | LTQ-FT |
| 15298(PRIDE) | Mouse ES Cell Nuclear Extract | Mouse | Embryonic stem cells | LTQ-FT |
| 15299(PRIDE) | Mouse ES Cell Nuclear Extract | Mouse | Embryonic stem cells | LTQ-FT |
| PAe000381 | Placenta_Micro_UT | Mouse | Placenta | LCQ DECA XP |
| PAe000380 | Brain_NUC_UT | Mouse | Brain | LCQ DECA XP |
| PAe000379 | Heart_Cyto_UT | Mouse | Heart | LCQ DECA XP |
| PAe000376 | Liver_Micro_UT | Mouse | Liver | LCQ DECA XP |
| PAe000375 | Liver_NUC_UT | Mouse | Liver | LCQ DECA XP |
| PAe000374 | Lung_NUC_UT | Mouse | Lung | LCQ DECA XP |
| PAe000373 | Brain_Cyto_UT | Mouse | Brain | LCQ DECA XP |
| PAe000372 | Liver_NE_UT | Mouse | Liver | LCQ DECA XP |
| PAe000371 | Lung_NE_UT | Mouse | Lung | LCQ DECA XP |
| PAe000370 | Brain_Micro_UT | Mouse | Brain | LCQ DECA XP |
| PAe000369 | Liver_Mito_UT | Mouse | Liver | LCQ DECA XP |
| PAe000368 | Kidney_Micro_UT | Mouse | Kidney | LCQ DECA XP |
| PAe000367 | Placenta_NUC_UT | Mouse | Placenta | LCQ DECA XP |
| PAe000366 | Placenta_Mito_UT | Mouse | Placenta | LCQ DECA XP |
| PAe000364 | Liver_Cyto_UT | Mouse | Liver | LCQ DECA XP |
| PAe000363 | Lung_Micro_UT | Mouse | Lung | LCQ DECA XP |
| PAe000362 | Lung_Cyto_UT | Mouse | Lung | LCQ DECA XP |
| PAe000361 | Placenta_Cyto_UT | Mouse | Placenta | LCQ DECA XP |
| PAe000360 | Kidney_NUC_UT | Mouse | Kidney | LCQ DECA XP |
| PAe000359 | Brain_Mito_UT | Mouse | Brain | LCQ DECA XP |
| PAe000358 | Kidney_Mito_UT | Mouse | Kidney | LCQ DECA XP |
| PAe000357 | Lung_Mito_UT | Mouse | Lung | LCQ DECA XP |
| PAe000355 | Kidney_Cyto_UT | Mouse | Kidney | LCQ DECA XP |
| PAe000354 | Heart_Micro_UT | Mouse | Heart | LCQ DECA XP |
| PAe000353 | Heart_Mito_UT | Mouse | Heart | LCQ DECA XP |
| PAe000418 | her-2_tumor | Mouse | Mammary cancer | LTQ |
| PAe000416 | her-2_normal | Mouse | Mammary | LTQ |
| PAe000273 | BrainOctylSolLCQ | Mouse | Brain | LCQ Classic |
| PAe000272 | BrainOctylGlucLTQ | Mouse | Brain | LTQ |
| PAe000271 | BrainWaterSolLTQ | Mouse | Brain | LTQ |
| PAe000270 | KidneyAnionLTQ | Mouse | Kidney | LTQ |
| PAe000269 | KidneyAnionEX | Mouse | Kidney | LCQ Classic |
| PAe000268 | BrainWaterSolLCQ | Mouse | Brain | LCQ Classic |
| PAe000309 | mm_liver_organelle-25_1 | Mouse | Liver | LCQ DECA |
| PAe000308 | mm_liver_organelle-20_9-10 | Mouse | Liver | LCQ DECA XP |
| PAe000307 | RBC_membrane | Mouse | Red Blood Cell | LTQ |
| PAe000306 | mm_liver_organelle-pre7 | Mouse | Liver | LCQ DECA |
| PAe000305 | brain_micro | Mouse | Brain | LCQ DECA |
| PAe000304 | kidney_micro | Mouse | Kidney | LCQ DECA |
| PAe000303 | heart_micro | Mouse | Heart | LCQ DECA |
| PAe000301 | mm_dba2_nucleus | Mouse | Nuclear | LCQ DECA |
| PAe000300 | mm_testes | Mouse | Testes | LCQ DECA |
| PAe000295 | mm_dba2_micro | Mouse | Microsomal | LCQ DECA |
| PAe000291 | mm_dba2_HMP | Mouse | DBA2 HMP | LCQ DECA |
| PAe000289 | mm_dba2_cyto | Mouse | Cytoplasmic | LCQ DECA |
| PAe000288 | mm_liver_organelle | Mouse | Liver | LCQ DECA |
| PAe000417 | mm_liver_organelle-pre5_6 | Mouse | Liver | LTQ |
| PAe000297 | MannMouseLiver | Mouse | Liver | LTQ |
| PAe000302 | nuclear_2004-09-20 | Mouse | Nuclear | LCQ Classic |
| PAe000299 | nuclear_2004-09-21 | Mouse | Nuclear | LCQ Classic |
| PAe000298 | cytoplasmic_2004-09-28 | Mouse | Cytoplasmic | LCQ Classic |
| PAe000296 | nuclear_2004-09-24 | Mouse | Nuclear | LCQ Classic |
| PAe000294 | nuclear_2004-09-23 | Mouse | Nuclear | LCQ Classic |
| PAe000293 | cytoplasmic_2004-07-27 | Mouse | Cytoplasmic | LCQ Classic |
| PAe000292 | cytoplasmic_2004-07-28 | Mouse | Cytoplasmic | LCQ Classic |
| PAe000290 | cytoplasmic_2004-07-30 | Mouse | Cytoplasmic | LCQ Classic |
| PAe000323 | MmPlasIPAS14_LateStgCaCo_Hvd | Mouse | Plasma | LTQ FT |
| PAe000322 | MmPlasIPAS17_LateStgOvCa | Mouse | Plasma | LTQ FT |
| PAe000321 | MmPlasIPAS20_2_LateStgBrCa | Mouse | Plasma | LTQ Orbitrap |
| PAe000320 | MmPlasIPAS11_LateStgPaCa | Mouse | Plasma | LTQ FT |
| PAe000382 | org_m1 | Mouse | Macrophases | ABI QSTAR |
| PAe000378 | org_m2 | Mouse | Macrophases | ABI QSTAR |
| PAe000365 | org_t | Mouse | Macrophases | ABI QSTAR |
| PAe000377 | her2_tumor | Mouse | Mammary cancer | LTQ |
| PAe000356 | her2_normal | Mouse | Mammary | LTQ |
